# Supplementary material
Source: PubMed Central journal article supplement (PMC3956616)

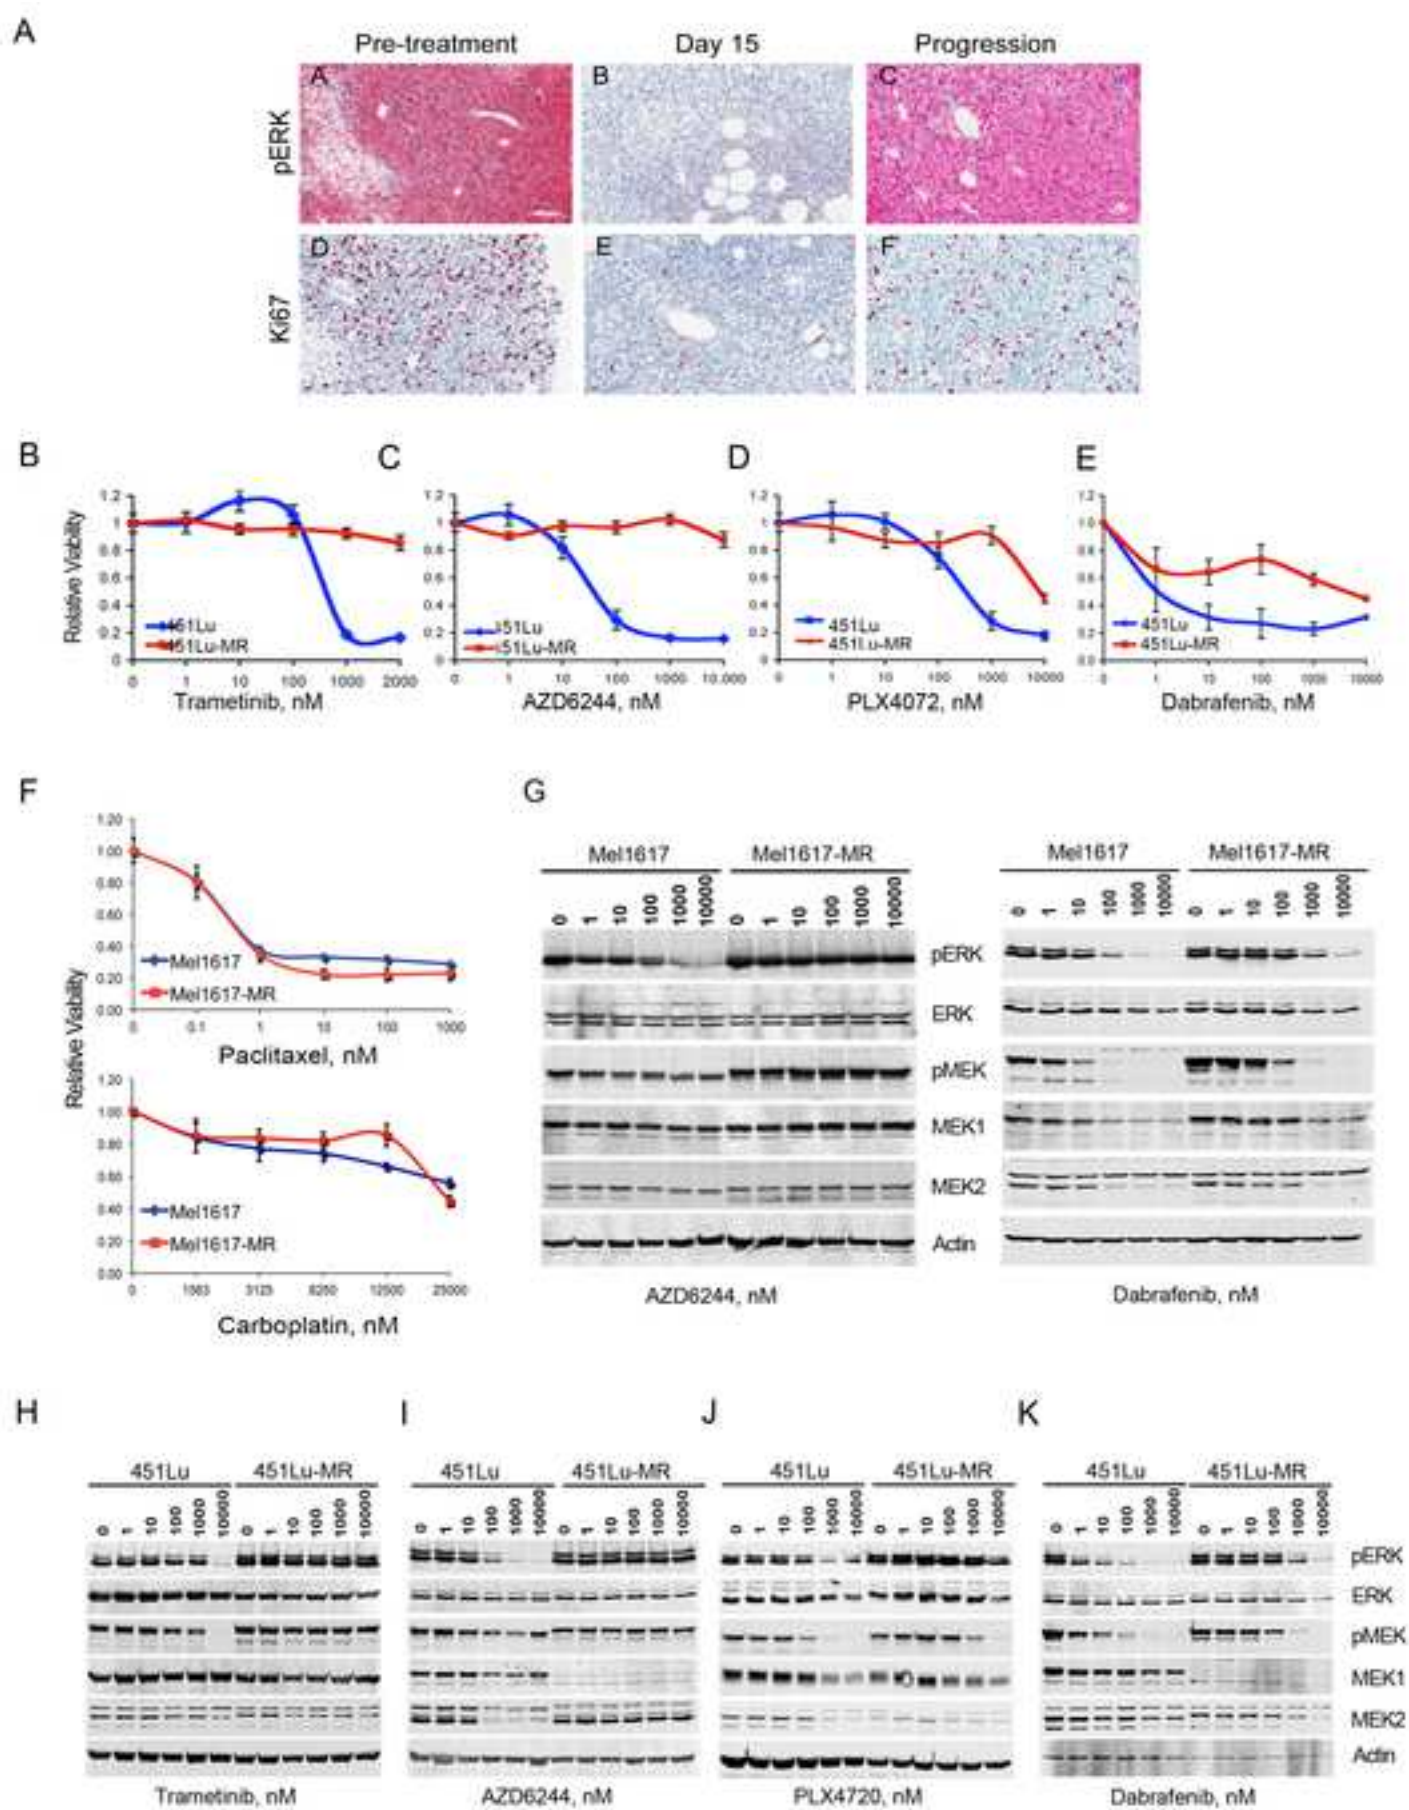

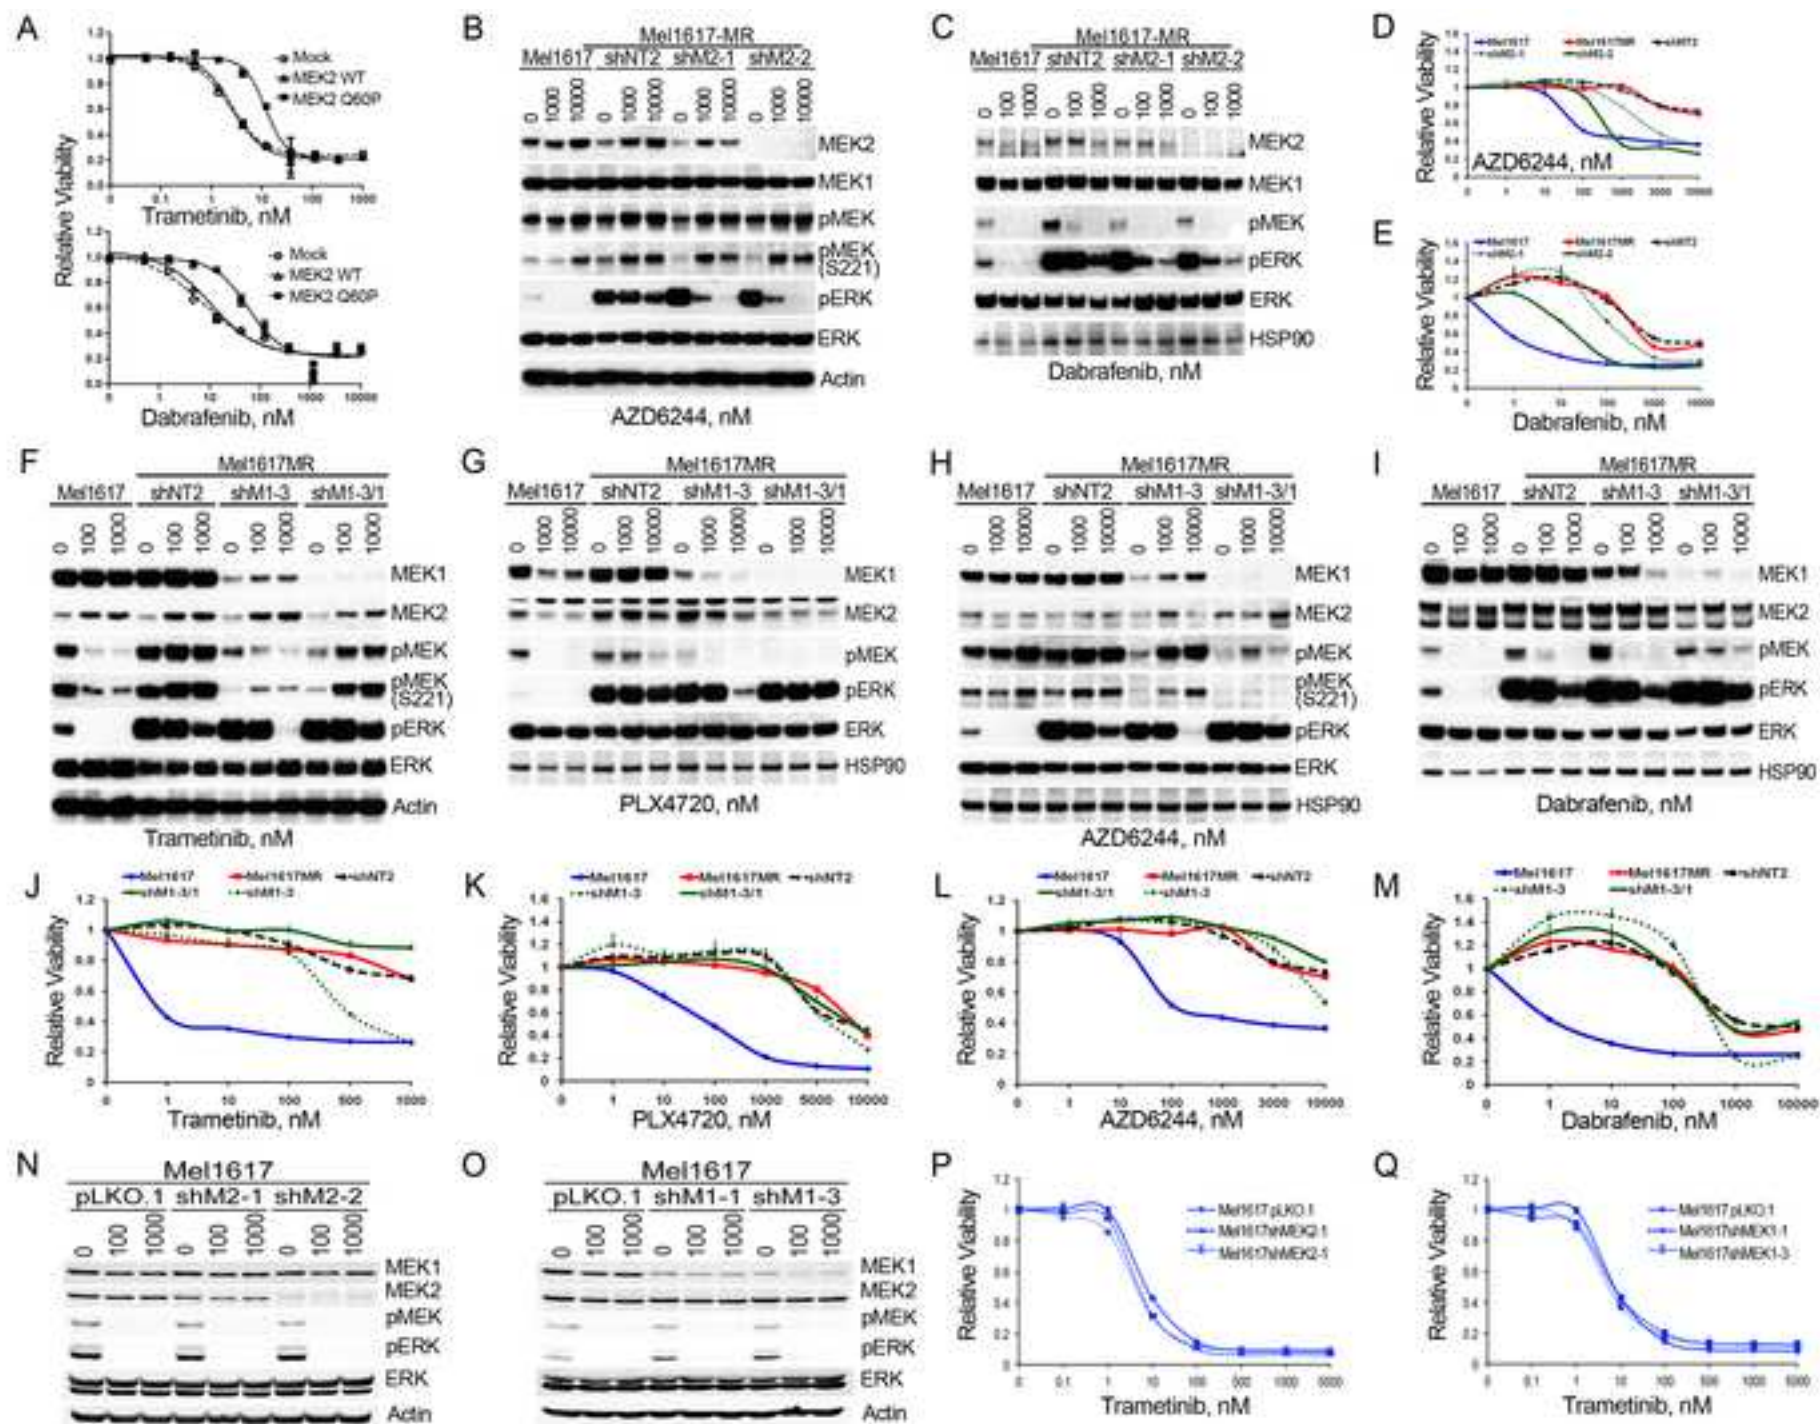



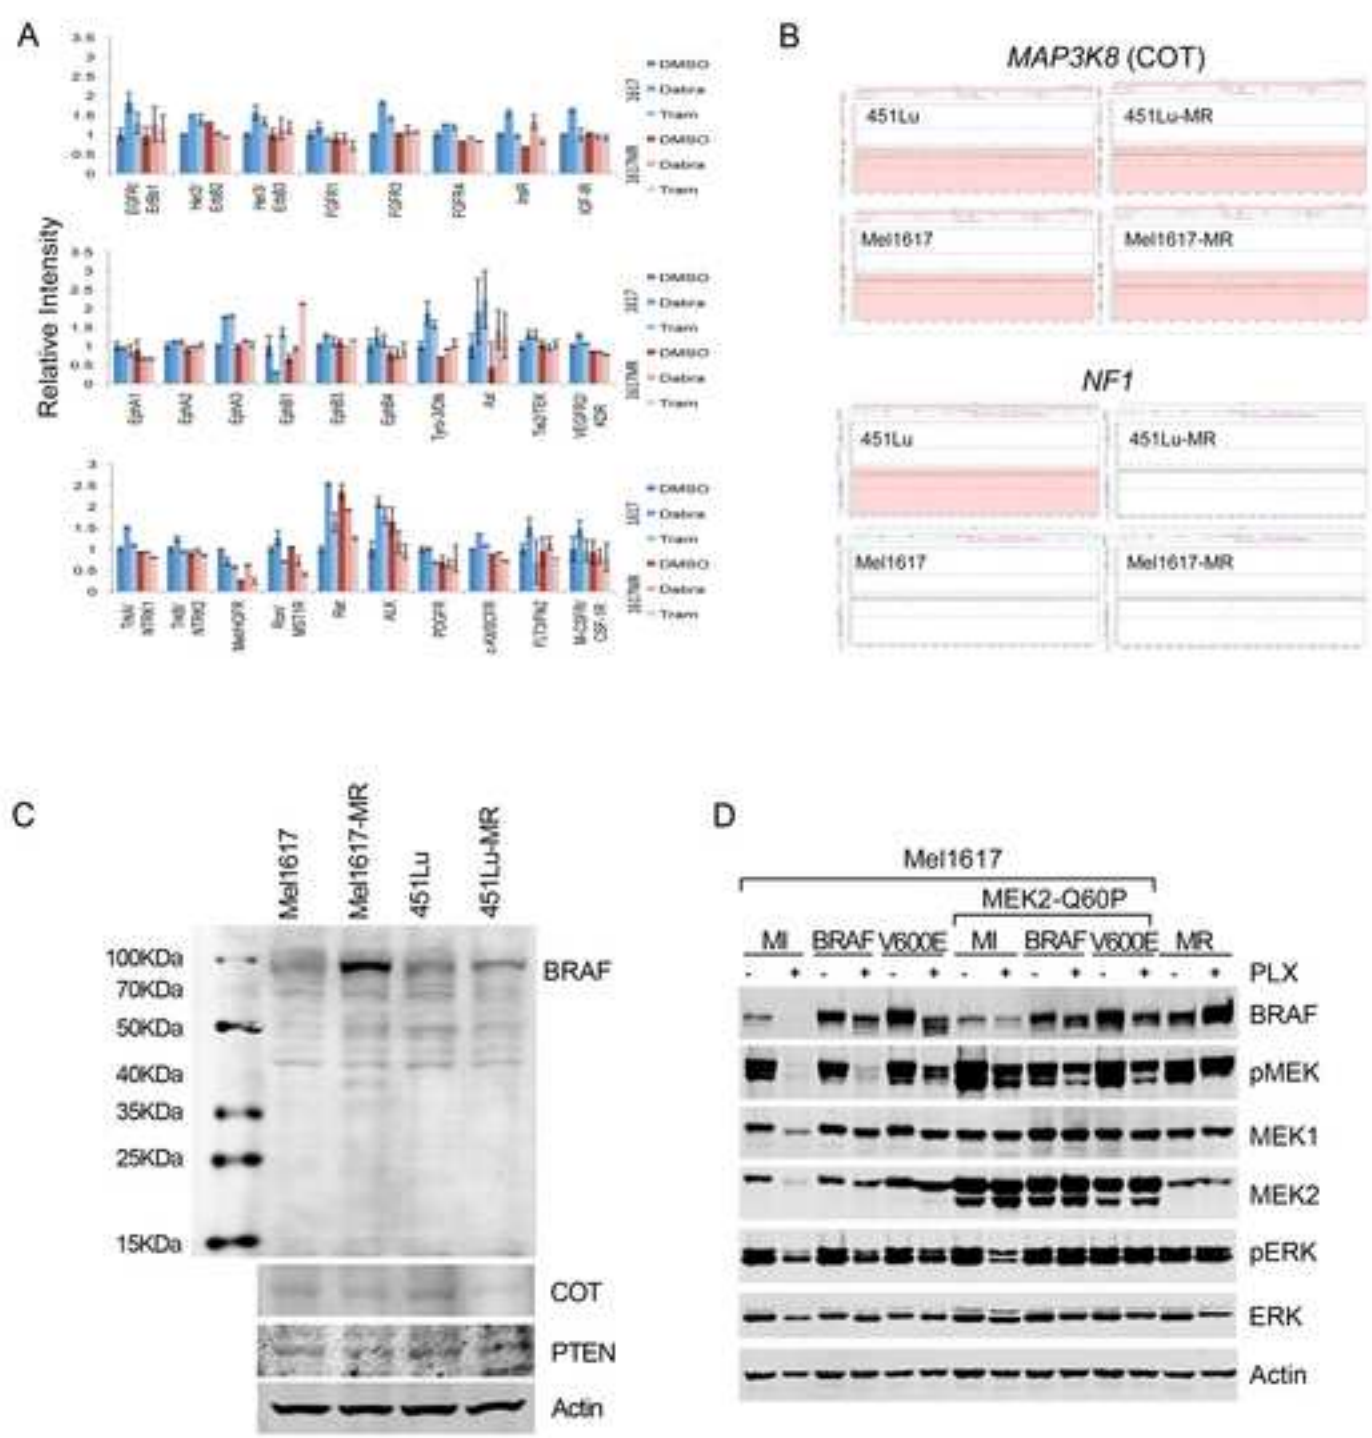

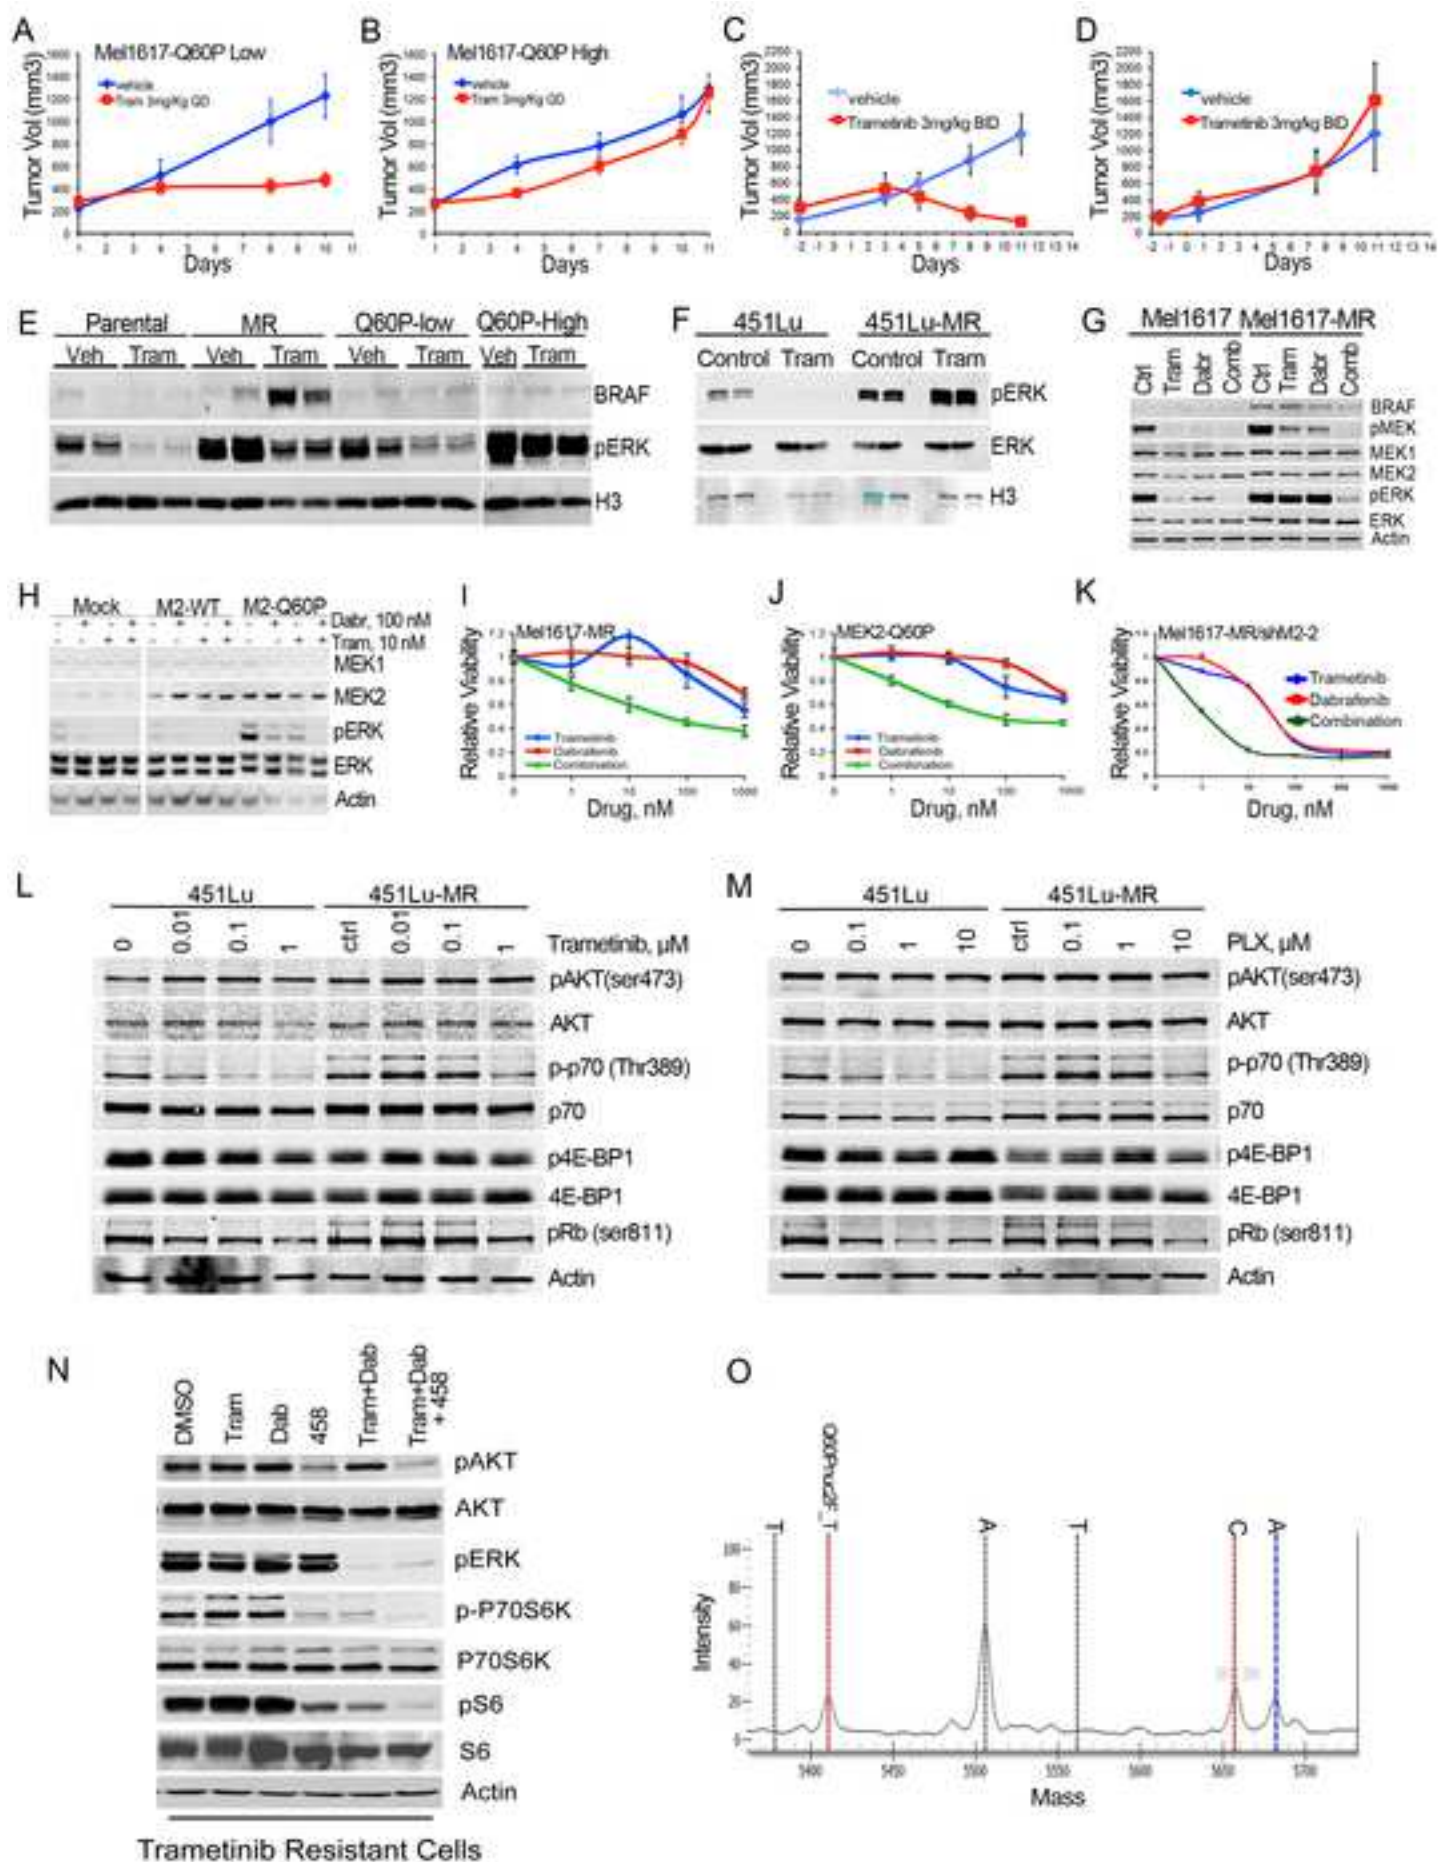

Trametinib Resistant Cells

Supplement: NIHMS521824-supplement-02.pdf [file NIHMS521824-supplement-02.pdf]
